# Supplementary material for: Utilization of Super BAC Pools and Fluidigm Access Array Platform for High-Throughput BAC Clone Identification: Proof of Concept
Source: Hindawi journal article supplement (doi:10.1155/2012/405940), 2012-01-01
Supplement: f1 [file 405940.f1.pdf]

**Supplemental Table S1.** SNP marker name, GenBank dbSNP accession ID, polymorphism type, KASPar™ primer sequences (A1, A2 and Common Reverse) for all 96 SNP assays tested.

| SNP Name | GenBank SS# <sup>1</sup> | SNP Type | A1 primer (5'→3') <sup>2</sup>                                        | A2 primer (5'→3') <sup>2</sup>                                        | Common Reverse (5'→3') <sup>2</sup> | L <sub>3</sub> |
|----------|--------------------------|----------|-----------------------------------------------------------------------|-----------------------------------------------------------------------|-------------------------------------|----------------|
| AM18192  | ss161142184              | G/T      | <b>GAAGGTGACCAAGTTCATGCTTTAGA</b><br>ACGTGAAACCAATCTGTGTTG            | <b>GAAGGTCGGAGTCAACGGATTATTTA</b><br>GAACGTGAAACCAATCTGTGTTT          | GTTGATCGACAGATG<br>ATAAGGTCAGAAAT   | 1              |
| AM18598  | ss161142590              | C/T      | <b>GAAGGTGACCAAGTTCATGCTAGTATT</b><br>TAAAGGAACAAATATACTCTATTACG      | <b>GAAGGTCGGAGTCAACGGATTAGTAT</b><br>TTAAAGGAACAAATATACTCTATTACA      | GGTGGAAATTTAGC<br>TTCGGTTGGGAA      | 1              |
| AM18740  | ss161142732              | A/T      | <b>GAAGGTGACCAAGTTCATGCTATTCGA</b><br>TTAATTTCAACTGCAACAAAGTAAAA      | <b>GAAGGTCGGAGTCAACGGATTGATT</b><br>AATTTCAACTGCAACAAAGTAAAT          | GATTGTGTTAGTTTC<br>TGATTTCTGTTTATT  | 1              |
| AM18741  | ss161142733              | C/T      | <b>GAAGGTGACCAAGTTCATGCTAAGGC</b><br>GGCGAAAGAGGAAAGC                 | <b>GAAGGTCGGAGTCAACGGATTGAAGG</b><br>CGGCGAAAGAGGAAAGT                | CGTCCAATATAAATT<br>TTCTCTCCTCTA     | 1              |
| AM18918  | ss161142910              | C/T      | <b>GAAGGTGACCAAGTTCATGCTATAGA</b><br>AGTAAATTTGATATGACAAATTAAGAA<br>G | <b>GAAGGTCGGAGTCAACGGATTATAGA</b><br>AGTAAATTTGATATGACAAATTAAGAA<br>A | TCTCAATAACTCTTCT<br>GCCCTACGAAATT   | 1              |
| AM18919  | ss161142911              | A/G      | <b>GAAGGTGACCAAGTTCATGCTAAATTT</b><br>GTTCTATTTATCTTTTTAATTTGTCA      | <b>GAAGGTCGGAGTCAACGGATTAAATT</b><br>TGTTCTATTTATCTTTTTAATTTGTCTG     | TTATGGTGTGTGGTA<br>AAGTGAAAGA       | 1              |
| AM19008  | ss161143000              | A/T      | <b>GAAGGTGACCAAGTTCATGCTGAGAA</b><br>GTATAGGGCTGTCATCGTTA             | <b>GAAGGTCGGAGTCAACGGATTGAGAA</b><br>GTATAGGGCTGTCATCGTTT             | GTAATCCCTGCCTATG<br>TCTAAGACAA      | 1              |
| AM19009  | ss161143001              | C/T      | <b>GAAGGTGACCAAGTTCATGCTAATAAT</b><br>GGGTAATTAATGAGTTAAGGGAC         | <b>GAAGGTCGGAGTCAACGGATTCTAAT</b><br>AATGGGTAATTAATGAGTTAAGGGAT       | CATCAGCAATTCTTCA<br>AGCGAACCGAT     | 1              |
| AM19010  | ss161143002              | C/T      | <b>GAAGGTGACCAAGTTCATGCTGCGAA</b><br>CCGATTCCTGAGGGGAAAG              | <b>GAAGGTCGGAGTCAACGGATTAAAGCG</b><br>AACCGATTCCTGAGGGGAA             | GGAGTACTCAACCTA<br>TAAGTCATGACTTT   | 1              |
| AM19011  | ss161143003              | C/T      | <b>GAAGGTGACCAAGTTCATGCTTTCTCG</b><br>GAAGCTAACATGTCTCG               | <b>GAAGGTCGGAGTCAACGGATTCTTCT</b><br>CGGAAGCTAACATGTCTCA              | GATTTGAACACTTAG<br>TGCGCAAGATTGAA   | 1              |
| AM19012  | ss161143004              | C/G      | <b>GAAGGTGACCAAGTTCATGCTCCAGT</b><br>GGTATAAAAACCCGATCAAAG            | <b>GAAGGTCGGAGTCAACGGATTCCAGT</b><br>GGTATAAAAACCCGATCAAAC            | GAGACATGTTAGCTT<br>CCGAGAAAGAAATA   | 1              |
| AM19376  | ss161143368              | C/G      | <b>GAAGGTGACCAAGTTCATGCTCGTAC</b><br>ATTCCTCACTCAC                    | <b>GAAGGTCGGAGTCAACGGATTCTCGT</b><br>CACATTCCTCACTCAG                 | CAATCCAATATCCACC<br>TCAAAAACAAGGT   | 1              |
| AM19378  | ss161143370              | G/T      | <b>GAAGGTGACCAAGTTCATGCTCATCAT</b><br>CATCATCAATCCAATATCCC            | <b>GAAGGTCGGAGTCAACGGATTATATC</b><br>ATCATCATCATCAATCCAATATCCA        | GTACAGGTATGGATT<br>GCTCGTCACAT      | 1              |
| AM19379  | ss161143371              | C/G      | <b>GAAGGTGACCAAGTTCATGCTAGATA</b><br>ACGGTCAAATGGATCACTTC             | <b>GAAGGTCGGAGTCAACGGATTAGATA</b><br>ACGGTCAAATGGATCACTTG             | ATGAATATTTCTTCTC<br>ACAATTGAGCTCAA  | 1              |
| AM19395  | ss161143387              | G/T      | <b>GAAGGTGACCAAGTTCATGCTAGTGC</b><br>TAAGTATGTGTTACAGAGG              | <b>GAAGGTCGGAGTCAACGGATTAAAGTG</b><br>CTAAGTATGTGTTACAGAGT            | CAACATGTTCTTTCTG<br>GGGACATATGTTT   | 1              |
| AM19431  | ss161143423              | C/T      | <b>GAAGGTGACCAAGTTCATGCTGGCTA</b><br>ATAAGTTAATATCATGTTATGGGG         | <b>GAAGGTCGGAGTCAACGGATTGGCTA</b><br>ATAAGTTAATATCATGTTATGGGA         | TAAGCTTTGAACTCC<br>AACAAGATTGCGTA   | 1              |
| AM19452  | ss161143444              | G/T      | <b>GAAGGTGACCAAGTTCATGCTCGCATT</b><br>TTACGTGCCGATTAACAC              | <b>GAAGGTCGGAGTCAACGGATTCCGCA</b><br>TTTTACGTGCCGATTAACAA             | ATGATAGTAAGGTAA<br>CGTCGAACCATGAA   | 1              |
| AM19464  | ss161143456              | A/G      | <b>GAAGGTGACCAAGTTCATGCTGAAAT</b><br>ATAAAAACAATATCTCACTTGATTTGAAT    | <b>GAAGGTCGGAGTCAACGGATTGAAAT</b><br>ATAAAAACAATATCTCACTTGATTTGAAC    | CTGAAATTCACCCAA<br>AGACCTGAATGAA    | 1              |
| AM1966   | ss16114365               | C/T      | <b>GAAGGTGACCAAGTTCATGCTCCGTTG</b><br>ACATTAGGGATGCTTGG               | <b>GAAGGTCGGAGTCAACGGATTACCGT</b><br>TGACATTAGGGATGCTTGA              | GGATAATAACTAACA<br>AGAAAAGAAAGGAA   | 1              |

|                 |                     |         |                                                                       |                                                                       |                                        |   |
|-----------------|---------------------|---------|-----------------------------------------------------------------------|-----------------------------------------------------------------------|----------------------------------------|---|
| 2               | 4                   |         |                                                                       |                                                                       | A                                      |   |
| AM1<br>966<br>3 | ss161<br>14365<br>5 | C/<br>G | <b>GAAGGTGACCAAGTTCATGCTGACTTT</b><br>GATATAGCAAGTTACGATGAG           | <b>GAAGGTCGGAGTCAACGGATTGACTT</b><br>TGATATAGCAAGTTACGATGAC           | GGATAATAACTAACA<br>AGAAAAGAAAGGAA<br>A | 1 |
| AM1<br>966<br>4 | ss161<br>14365<br>6 | A/<br>G | <b>GAAGGTGACCAAGTTCATGCTAATAA</b><br>GAATACCAGTGTCCAGCTCT             | <b>GAAGGTCGGAGTCAACGGATTATAAG</b><br>AATACCAGTGTCCAGCTCC              | ACGGTGCATCGTAA<br>CTTGCTATATCAAA       | 1 |
| AM1<br>966<br>5 | ss161<br>14365<br>7 | G<br>/T | <b>GAAGGTGACCAAGTTCATGCTCAGAG</b><br>TCAGAGCTGGAACACG                 | <b>GAAGGTCGGAGTCAACGGATTCCAGA</b><br>GTCAGAGCTGGAACACT                | CACCCAATGGATAGC<br>GACAGTGAAT          | 1 |
| AM2<br>143<br>2 | ss161<br>14542<br>4 | A/<br>C | <b>GAAGGTGACCAAGTTCATGCTGCATAT</b><br>ACTCATTAAAGCCATTTATTGTAATGT     | <b>GAAGGTCGGAGTCAACGGATTATAT</b><br>ACTCATTAAAGCCATTTATTGTAATGG       | GTAAAAAGTCGAAGA<br>ATCAAGGAGGGAT       | 1 |
| AM2<br>154<br>6 | ss161<br>14553<br>8 | C/<br>T | <b>GAAGGTGACCAAGTTCATGCTTTCAAG</b><br>GATATTCATGCTTTAGTCG             | <b>GAAGGTCGGAGTCAACGGATTATTTT</b><br>AAGGATATTCATGCTTTAGTCG           | ACAGTAAACGGGAGT<br>GATGTGGTTATTATA     | 1 |
| AM2<br>190<br>1 | ss161<br>14589<br>3 | A/<br>G | <b>GAAGGTGACCAAGTTCATGCTGAGTA</b><br>TGTCGGCCAGAATTGGA                | <b>GAAGGTCGGAGTCAACGGATTAGTAT</b><br>GTCGGCCAGAATTGGG                 | GGGATGAGGTATACC<br>GCTGGAAAAT          | 1 |
| AM2<br>190<br>5 | ss161<br>14589<br>7 | C/<br>T | <b>GAAGGTGACCAAGTTCATGCTGATTAC</b><br>TGAACCTGAAATCTTATTGAACATC       | <b>GAAGGTCGGAGTCAACGGATTATGAT</b><br>TACTGAACTTGAATCTTATTGAACATT      | GCTTATTCATAAGGC<br>AACAAACAACATCAT     | 1 |
| AM2<br>200<br>4 | ss161<br>14599<br>6 | A/<br>G | <b>GAAGGTGACCAAGTTCATGCTAGCTTA</b><br>GAGCCAAGGCACAACAA               | <b>GAAGGTCGGAGTCAACGGATTGCTTA</b><br>GAGCCAAGGCACAACAG                | TCCTTTCAGTCCAGA<br>GCCTCCAAA           | 1 |
| AM2<br>247<br>1 | ss161<br>14646<br>3 | A/<br>C | <b>GAAGGTGACCAAGTTCATGCTCGGTG</b><br>GTTTGAGTGTAGAGAAAAG              | <b>GAAGGTCGGAGTCAACGGATTGGTGG</b><br>TTTGAGTGTAGAGAAAAGC              | CCACTTGATCCAGCCT<br>ACATTCCAT          | 1 |
| AM2<br>248<br>7 | ss161<br>14647<br>9 | C/<br>G | <b>GAAGGTGACCAAGTTCATGCTATTAGC</b><br>TTGAATGCTAAGGATATGGC            | <b>GAAGGTCGGAGTCAACGGATTATTAG</b><br>CTTGAATGCTAAGGATATGGG            | GCTTTAGACACAAGA<br>GAAATAAACTCCAAA     | 1 |
| AM2<br>311<br>2 | ss161<br>14710<br>4 | C/<br>G | <b>GAAGGTGACCAAGTTCATGCTATCAA</b><br>GGAAAAATTTACTTTAAAGCTATGTTA<br>C | <b>GAAGGTCGGAGTCAACGGATTATCAA</b><br>GGAAAAATTTACTTTAAAGCTATGTTA<br>G | ACTCGAAGTGAATA<br>CTTGTTACGTATT        | 1 |
| AM2<br>315<br>8 | ss161<br>14715<br>0 | A/<br>G | <b>GAAGGTGACCAAGTTCATGCTCTCCCA</b><br>CGGATCATGTGCATAT                | <b>GAAGGTCGGAGTCAACGGATTCTCCC</b><br>ACGGATCATGTGCATAC                | CCTGAAAAGTGCCT<br>AATCGTCAATGATA       | 1 |
| AM2<br>319<br>6 | ss161<br>14718<br>8 | C/<br>T | <b>GAAGGTGACCAAGTTCATGCTATATTC</b><br>AGCAAATGATTCCTTCAATGATC         | <b>GAAGGTCGGAGTCAACGGATTATATT</b><br>CAGCAAATGATTCCTTCAATGATT         | CACAACAGTGGCTTA<br>CTTTTTAATCAAGAT     | 1 |
| AM2<br>385<br>7 | ss161<br>14784<br>9 | G<br>/T | <b>GAAGGTGACCAAGTTCATGCTAATTTT</b><br>ATTATCAGTGATAATTTGTCTTTGCTG     | <b>GAAGGTCGGAGTCAACGGATTAATTTT</b><br>ATTATCAGTGATAATTTGTCTTTGCTT     | GTTGCTTTTGAGAA<br>TCGAGCATAATGAT       | 1 |
| AM2<br>389<br>1 | ss161<br>14788<br>3 | A/<br>T | <b>GAAGGTGACCAAGTTCATGCTGACGC</b><br>CTGCTGACCTGCATAAA                | <b>GAAGGTCGGAGTCAACGGATTGACGC</b><br>CTGCTGACCTGCATAAT                | TAGAGTCTCATTTAG<br>GCGAGTTACCAT        | 1 |
| AM2<br>417<br>7 | ss161<br>14816<br>9 | A/<br>G | <b>GAAGGTGACCAAGTTCATGCTTATGGT</b><br>CGTTAAAAAATATACGAACCGAT         | <b>GAAGGTCGGAGTCAACGGATTGGTCG</b><br>TTAAAAAATATACGAACCGAC            | AAAGTTTAGCACCTC<br>TTTGGTTGCTTCTT      | 1 |
| AM2<br>417<br>9 | ss161<br>14817<br>1 | C/<br>T | <b>GAAGGTGACCAAGTTCATGCTTTTATG</b><br>GTCGTTAAAAAATATACGAACCG         | <b>GAAGGTCGGAGTCAACGGATTTTAT</b><br>GGTCGTTAAAAAATATACGAACCA          | AAAGTTTAGCACCTC<br>TTTGGTTGCTTCTT      | 1 |
| AM2<br>445<br>7 | ss161<br>14844<br>9 | A/<br>G | <b>GAAGGTGACCAAGTTCATGCTTATACA</b><br>GTGTGGCTTTGGAGGCA               | <b>GAAGGTCGGAGTCAACGGATTATACA</b><br>GTGTGGCTTTGGAGGCG                | TAAATTGAGAGCACA<br>ACGCAGTGCAA         | 1 |
| AM2<br>466<br>1 | ss161<br>14865<br>3 | C/<br>T | <b>GAAGGTGACCAAGTTCATGCTTGCACT</b><br>TTGTGATTGTTAACGATAAATC          | <b>GAAGGTCGGAGTCAACGGATTCTTGC</b><br>ACTTTGTGATTGTTAACGATAAAT         | GCCAAACATATGTTA<br>GAGGCAACTCAAT       | 1 |
| AM2<br>498<br>3 | ss161<br>14897<br>5 | C/<br>T | <b>GAAGGTGACCAAGTTCATGCTGTTGG</b><br>AGTAGTTCATTACGATAAGAG            | <b>GAAGGTCGGAGTCAACGGATTGTTG</b><br>GAGTAGTTCATTACGATAAGAA            | GTTCAAATCTGGTTG<br>GTGGATATGTTGAA      | 1 |
| AM2<br>524<br>1 | ss161<br>14923<br>3 | C/<br>G | <b>GAAGGTGACCAAGTTCATGCTCATTTT</b><br>GAATATCAAATGTGATCATATGGC        | <b>GAAGGTCGGAGTCAACGGATTATTTT</b><br>GAATATCAAATGTGATCATATGGG         | CCTTTCTGACACAC<br>CAAAAATAAATCAA       | 1 |
| AM2             | ss161               | A/      | <b>GAAGGTGACCAAGTTCATGCTGTTGA</b>                                     | <b>GAAGGTCGGAGTCAACGGATTGAAGC</b>                                     | TCCTTCTGACTGCC                         | 1 |

|                 |                     |         |                                                                        |                                                                        |                                      |   |
|-----------------|---------------------|---------|------------------------------------------------------------------------|------------------------------------------------------------------------|--------------------------------------|---|
| 526<br>1        | 14925<br>3          | G       | AGCCAAAGATTCAGGTCGT                                                    | CAAAGATTCAGGTCGC                                                       | GTGCTCA                              |   |
| AM2<br>530<br>9 | ss161<br>14930<br>1 | A/<br>G | <b>GAAGGTGACCAAGTTCATGCTAAAAC</b><br>TATACTGAAAACCTACGCTATATAATTA      | <b>GAAGGTGGGAGTCAACGGATTA</b> AAAAC<br>TATACTGAAAACCTACGCTATATAATTG    | CATGACTCTAAAAGG<br>TTGTCATTGTAACAA   | 1 |
| AM2<br>613<br>3 | ss161<br>15012<br>5 | A/<br>C | <b>GAAGGTGACCAAGTTCATGCTCAGGC</b><br>AATGTGGCTGGTGATGAT                | <b>GAAGGTGGGAGTCAACGGATTAGGCA</b><br>ATGTGGCTGGTGATGAG                 | CTGCCTAAGTTTGCCCT<br>ATCACACAGAT     | 1 |
| AM2<br>643<br>8 | ss161<br>15043<br>0 | C/<br>T | <b>GAAGGTGACCAAGTTCATGCTGAATA</b><br>AATATTGAAGGTTGAACGTTGAAC          | <b>GAAGGTGGGAGTCAACGGATTGTTGA</b><br>ATAAATATTGAAGGTTGAACGTTGAAT       | AACCTTCAATCTTCAA<br>CCATCTGCCAT      | 1 |
| AM1<br>719<br>0 | ss161<br>14118<br>2 | C/<br>T | <b>GAAGGTGACCAAGTTCATGCTGAGCC</b><br>AACCTGACGAATATTCCC                | <b>GAAGGTGGGAGTCAACGGATTAGAGC</b><br>CAACCTGACGAATATTCTT               | GTGTAGATGCAACAC<br>AGCTTCTCCTA       | 2 |
| AM1<br>719<br>1 | ss161<br>14118<br>3 | A/<br>G | <b>GAAGGTGACCAAGTTCATGCTGGATA</b><br>GAAGTGTAGATGCAACACAGT             | <b>GAAGGTGGGAGTCAACGGATTGATAG</b><br>AAGTGTAGATGCAACACAGC              | AAGTAAAATAATTAG<br>CGTCAGATAGGAGAA   | 2 |
| AM1<br>808<br>1 | ss161<br>14207<br>3 | G<br>/T | <b>GAAGGTGACCAAGTTCATGCTAATCG</b><br>ACGGCGTTATTAACCTCAC               | <b>GAAGGTGGGAGTCAACGGATTCTAAT</b><br>CGACGGCGTTATTAACCTCAA             | CTTAATGCATTTTAGA<br>TATTTTATACATTA   | 2 |
| AM1<br>808<br>2 | ss161<br>14207<br>4 | C/<br>G | <b>GAAGGTGACCAAGTTCATGCTCATAA</b><br>AAATAACTTTTTGGGCATGATGCG          | <b>GAAGGTGGGAGTCAACGGATTATAA</b><br>AAATAACTTTTTGGGCATGATGCC           | CGTCGATTAGCATGT<br>GCACACAGT         | 2 |
| AM1<br>809<br>2 | ss161<br>14208<br>4 | A/<br>G | <b>GAAGGTGACCAAGTTCATGCTATAAAA</b><br>CAGTACAATAATATTGTCTACAAAGCA<br>T | <b>GAAGGTGGGAGTCAACGGATTAAACAG</b><br>TACAATAATATTGTCTACAAAGCAC        | CAAGTTGGATTACAGC<br>CCAGACTTCTA      | 2 |
| AM1<br>896<br>0 | ss161<br>14295<br>2 | A/<br>T | <b>GAAGGTGACCAAGTTCATGCTAATTAT</b><br>GATTGGACACCATCAAGAAATAATATA      | <b>GAAGGTGGGAGTCAACGGATTAATTA</b><br>TGATTGGACACCATCAAGAAATAATAT<br>T  | CCAATGGGTAATGGG<br>TGATAGAGTATATT    | 2 |
| AM1<br>896<br>1 | ss161<br>14295<br>3 | A/<br>C | <b>GAAGGTGACCAAGTTCATGCTGATGTT</b><br>GGGTTTTATAGAGGAAATTTTGTTAT       | <b>GAAGGTGGGAGTCAACGGATTGTTGG</b><br>GTTTTATAGAGGAAATTTTGTTAG          | ACCCATTGGCTATTAT<br>TTTCATATTGAAAT   | 2 |
| AM1<br>913<br>3 | ss161<br>14312<br>5 | A/<br>G | <b>GAAGGTGACCAAGTTCATGCTATACTA</b><br>TAATTCGCAAATAATCTTTATCAACT       | <b>GAAGGTGGGAGTCAACGGATTATACT</b><br>ATAATTCGCAAATAATCTTTATCAACC       | GGTGTGGGAAATAAC<br>ACTATTCTCACTAA    | 2 |
| AM1<br>952<br>7 | ss161<br>14351<br>9 | C/<br>G | <b>GAAGGTGACCAAGTTCATGCTGATGA</b><br>GAAGTATAAGTAGGAGACATC             | <b>GAAGGTGGGAGTCAACGGATTGATGA</b><br>GAAGTATAAGTAGGAGACATG             | CTTTAGGTTTCTCTTC<br>ATGTCCTTCACTT    | 2 |
| AM1<br>993<br>0 | ss161<br>14392<br>2 | A/<br>C | <b>GAAGGTGACCAAGTTCATGCTATAGG</b><br>AGTATAATAGTTGAAATGATTATGATT<br>A  | <b>GAAGGTGGGAGTCAACGGATTATAGG</b><br>AGTATAATAGTTGAAATGATTATGATT<br>C  | GAGGGAAATTGCATG<br>TCACTCGGTT        | 2 |
| AM1<br>993<br>1 | ss161<br>14392<br>3 | A/<br>G | <b>GAAGGTGACCAAGTTCATGCTGATTCA</b><br>GAATTAGTGTCAACCGAGTA             | <b>GAAGGTGGGAGTCAACGGATTAGAA</b><br>TTAGTGTCAACCGAGTG                  | TTCTGCTTTTCTGACT<br>GCTGAGTATTGTT    | 2 |
| AM1<br>993<br>2 | ss161<br>14392<br>4 | C/<br>G | <b>GAAGGTGACCAAGTTCATGCTACTAA</b><br>AATAAAAAGTAATGTAGAATACTGTATA<br>C | <b>GAAGGTGGGAGTCAACGGATTACTAA</b><br>AATAAAAAGTAATGTAGAATACTGTATA<br>G | GCTGCTTTAGTTTGA<br>AGCATATAAGCTT     | 2 |
| AM2<br>051<br>2 | ss161<br>14450<br>4 | C/<br>T | <b>GAAGGTGACCAAGTTCATGCTGTTAA</b><br>AGCTCTACAGTTCTTTGAGC              | <b>GAAGGTGGGAGTCAACGGATTGTTGT</b><br>TAAAGCTCTACAGTTCTTTGAGT           | GCAACTTCACATAAAA<br>TAAAGTGCACATGATT | 2 |
| AM2<br>053<br>6 | ss161<br>14452<br>8 | A/<br>G | <b>GAAGGTGACCAAGTTCATGCTTAAAG</b><br>TCTATAATTGTTAAATTAGATCGTAT        | <b>GAAGGTGGGAGTCAACGGATTAAAGT</b><br>CTATAATTGTTAAATTAGATCGTAC         | TGGCTTAATACTAAA<br>TAGCACTATCAATAT   | 2 |
| AM2<br>053<br>8 | ss161<br>14453<br>0 | C/<br>T | <b>GAAGGTGACCAAGTTCATGCTGATAC</b><br>ATCTTGCCAATTTAATACAAGTTC          | <b>GAAGGTGGGAGTCAACGGATTAATTG</b><br>ATACATCTTGCAATTTAATACAAGTTT       | CGAATTATGAATTGT<br>ATCAATCTTATGAAA   | 2 |
| AM2<br>088<br>6 | ss161<br>14487<br>8 | C/<br>T | <b>GAAGGTGACCAAGTTCATGCTCCATCT</b><br>AAAAATCAGGTTTGCTCTTTT            | <b>GAAGGTGGGAGTCAACGGATTCTCCAT</b><br>CTAAAAATCAGGTTTGCTCTTTT          | CAAAAGTTGGGCACA<br>ACACAACAAACAA     | 2 |
| AM2<br>112<br>0 | ss161<br>14511<br>2 | C/<br>T | <b>GAAGGTGACCAAGTTCATGCTCCTCAA</b><br>AATGATTTTATGAAAATCTACGATC        | <b>GAAGGTGGGAGTCAACGGATTACCTC</b><br>AAAATGATTTTATGAAAATCTACGATT       | GGGAGATGTTTTGTA<br>CTTGATTAGGCTT     | 2 |
| AM2<br>112<br>1 | ss161<br>14511<br>3 | C/<br>T | <b>GAAGGTGACCAAGTTCATGCTAATAG</b><br>ACCTTTGGGCTATCATCG                | <b>GAAGGTGGGAGTCAACGGATTGAATA</b><br>GACCTTTGGGCTATCATCA               | AAACATCTCCCGACT<br>ACACTTATTGAGAT    | 2 |

|                 |                     |         |                                                                   |                                                                   |                                    |   |
|-----------------|---------------------|---------|-------------------------------------------------------------------|-------------------------------------------------------------------|------------------------------------|---|
| AM2<br>112<br>2 | ss161<br>14511<br>4 | A/<br>G | <b>GAAGGTGACCAAGTTCATGCTGATAG</b><br>GCCAAAGGTCTATTCACA           | <b>GAAGGTCGGAGTCAACGGATTATAGG</b><br>CCCAAAGGTCTATTCACG           | GCAAGTTGATCAGTA<br>TAATTACCAACCCAT | 2 |
| AM2<br>174<br>3 | ss161<br>14573<br>5 | A/<br>G | <b>GAAGGTGACCAAGTTCATGCTCCTTGT</b><br>TTATGTCACCTTATGATCAAGTCA    | <b>GAAGGTCGGAGTCAACGGATTCTTGT</b><br>TATGTCACCTTATGATCAAGTCG      | AAGAGAATTTGTACC<br>AAAGCCGTGGAAA   | 2 |
| AM2<br>177<br>3 | ss161<br>14576<br>5 | A/<br>G | <b>GAAGGTGACCAAGTTCATGCTCAAATT</b><br>TGGTTTCTAATATATTTTAAAGTGTT  | <b>GAAGGTCGGAGTCAACGGATTCAAAT</b><br>TTGTTTCTAATATATTTTAAAGTGTC   | GGCACGCACACTTCA<br>CGCGAAT         | 2 |
| AM2<br>184<br>2 | ss161<br>14583<br>4 | A/<br>G | <b>GAAGGTGACCAAGTTCATGCTGGCGC</b><br>CTCGATGCGCTTCAT              | <b>GAAGGTCGGAGTCAACGGATTGCGCC</b><br>TCGATGCGCTTCAC               | CAAGGATAAGTTAAT<br>AACCAAAACCAACAA | 2 |
| AM2<br>209<br>9 | ss161<br>14609<br>1 | A/<br>G | <b>GAAGGTGACCAAGTTCATGCTACAAA</b><br>CTACTCCTGGATACTTTGAGAA       | <b>GAAGGTCGGAGTCAACGGATTCAAAC</b><br>TACTCCTGGATACTTTGAGAG        | ATGACCCCGACACGC<br>ATCAATGATA      | 2 |
| AM2<br>219<br>3 | ss161<br>14618<br>5 | A/<br>G | <b>GAAGGTGACCAAGTTCATGCTCAAAG</b><br>GGCATAACAGATTAGCTGAGA        | <b>GAAGGTCGGAGTCAACGGATTAAAGG</b><br>GCATAACAGATTAGCTGAGG         | GTCCAGCCAGCTGGC<br>ATAACAAATT      | 2 |
| AM2<br>239<br>3 | ss161<br>14638<br>5 | C/<br>T | <b>GAAGGTGACCAAGTTCATGCTGTTTGA</b><br>CTAACCAACAAGACAAAAACC       | <b>GAAGGTCGGAGTCAACGGATTGTTTG</b><br>ACTAACCAACAAGACAAAAACT       | CCACTCAACAAATAC<br>AAATAAAAGACTCTT | 2 |
| AM2<br>242<br>6 | ss161<br>14641<br>8 | C/<br>T | <b>GAAGGTGACCAAGTTCATGCTATATTT</b><br>AATTC AAGTGAAAATGTTGATTGCAC | <b>GAAGGTCGGAGTCAACGGATTATATT</b><br>TAATTC AAGTGAAAATGTTGATTGCAT | TGCTCCCAGACAAGAA<br>AGATCTTAATCTTA | 2 |
| AM2<br>255<br>8 | ss161<br>14655<br>0 | A/<br>G | <b>GAAGGTGACCAAGTTCATGCTATTTGT</b><br>AAAGGGTAAAATTTGAAATAGTGCATA | <b>GAAGGTCGGAGTCAACGGATTGTAAA</b><br>GGGTAAAATTTGAAATAGTGCATG     | GCACAAGGCCCAAAA<br>ATCAACAAAATTTT  | 2 |
| AM2<br>278<br>1 | ss161<br>14677<br>3 | A/<br>G | <b>GAAGGTGACCAAGTTCATGCTGGTAC</b><br>TAACTACAATTCAAAACATCTTAATAA  | <b>GAAGGTCGGAGTCAACGGATTGGTAC</b><br>TAACTACAATTCAAAACATCTTAATAG  | CAGTACGACTATTCA<br>TAGGCCTTAACATA  | 2 |
| AM2<br>291<br>1 | ss161<br>14690<br>3 | A/<br>T | <b>GAAGGTGACCAAGTTCATGCTAATCA</b><br>AGTAGATTA AAAAGGGTTTTACTCTAA | <b>GAAGGTCGGAGTCAACGGATTATCA</b><br>AGTAGATTA AAAAGGGTTTTACTCTAT  | AGTAACATGTTGTTC<br>CTTTTGCAGGTCTA  | 2 |
| AM2<br>300<br>6 | ss161<br>14699<br>8 | A/<br>C | <b>GAAGGTGACCAAGTTCATGCTACTAAT</b><br>AAGGTGACCCATATAGCTCT        | <b>GAAGGTCGGAGTCAACGGATTCTAAT</b><br>AAGGTGACCCATATAGCTCG         | CGCTAATATTTGATAT<br>CAATGGGTCACTAA | 2 |
| AM2<br>335<br>4 | ss161<br>14734<br>6 | A/<br>G | <b>GAAGGTGACCAAGTTCATGCTGTCCCG</b><br>GGTGGGGAGAGAT               | <b>GAAGGTCGGAGTCAACGGATTCCCGG</b><br>GTGGGGAGAGAC                 | CGATTAATTTGCTGC<br>AGAAAACACTTCTT  | 2 |
| AM2<br>380<br>8 | ss161<br>14780<br>0 | C/<br>T | <b>GAAGGTGACCAAGTTCATGCTCATTGA</b><br>GTTTACCACGCTGATAAGC         | <b>GAAGGTCGGAGTCAACGGATTATCATT</b><br>GAGTTTACCACGCTGATAAGT       | GCAAAGCGGCTTTTG<br>CAGGTGTCT       | 2 |
| AM2<br>389<br>5 | ss161<br>14788<br>7 | A/<br>G | <b>GAAGGTGACCAAGTTCATGCTGTCCTT</b><br>ACACGACTAAAAAACACCTTAT      | <b>GAAGGTCGGAGTCAACGGATTCTTAC</b><br>ACGACTAAAAAACACCTTAC         | AATGGAGTATAGCAT<br>GTCAAGATCCAATAT | 2 |
| AM2<br>402<br>9 | ss161<br>14802<br>1 | A/<br>G | <b>GAAGGTGACCAAGTTCATGCTATAAAT</b><br>TTTTCAAAGTGAAGTACTGATTGCTA  | <b>GAAGGTCGGAGTCAACGGATTTTTTCA</b><br>AACTGTAAGTACTGATTGCTG       | GGTCGAACATGTTGA<br>ACATGCTCAGAA    | 2 |
| AM2<br>451<br>5 | ss161<br>14850<br>7 | A/<br>T | <b>GAAGGTGACCAAGTTCATGCTAAGCC</b><br>TAATTTGCTGCAGGAATAGATA       | <b>GAAGGTCGGAGTCAACGGATTAAGCC</b><br>TAATTTGCTGCAGGAATAGATT       | TCAAAGAATGTTCTTC<br>TGGGGTGTCTTCTT | 2 |
| AM2<br>532<br>6 | ss161<br>14931<br>8 | C/<br>T | <b>GAAGGTGACCAAGTTCATGCTGTAAA</b><br>TAGTCCCATATGATATCTCG         | <b>GAAGGTCGGAGTCAACGGATTCTGTA</b><br>AATAGTCCCATATGATATCTCA       | CACCTCAAGTACTCAT<br>GACAAATGTTCAA  | 2 |
| AM2<br>549<br>7 | ss161<br>14948<br>9 | A/<br>G | <b>GAAGGTGACCAAGTTCATGCTGTTAGT</b><br>TTTGTAGAATCAAATGACAATGTCTT  | <b>GAAGGTCGGAGTCAACGGATTAGTTT</b><br>TGTAGAATCAAATGACAATGTCTC     | TCGACACTGATCTCT<br>CGGTAACAT       | 2 |
| AM2<br>591<br>9 | ss161<br>14991<br>1 | A/<br>G | <b>GAAGGTGACCAAGTTCATGCTGTTATT</b><br>GTTATGTATTGAGGTGTAATTGT     | <b>GAAGGTCGGAGTCAACGGATTATTGT</b><br>TATGTATTGAGGTGTAATTGC        | CACAATATCTCTTTCA<br>GCCATACCATCAA  | 2 |
| AM2<br>595<br>3 | ss161<br>14994<br>5 | C/<br>T | <b>GAAGGTGACCAAGTTCATGCTTCATT</b><br>AAATTACAAAAATTACATTACATGCG   | <b>GAAGGTCGGAGTCAACGGATTATTTA</b><br>AATTACAAAAATTACATTACATGCA    | ATGTGTATAAACACA<br>TCACAATACTCTCTA | 2 |
| AM2<br>617      | ss161<br>15016      | C/<br>T | <b>GAAGGTGACCAAGTTCATGCTAGGCT</b><br>TTCCAGCAACACTCGTG            | <b>GAAGGTCGGAGTCAACGGATTAGGC</b><br>TTCCAGCAACACTCGTA             | TGAGCATAGCTGACT<br>AAATAACACTAACAA | 2 |

|                 |                     |         |                                                                   |                                                                   |                                    |        |  |
|-----------------|---------------------|---------|-------------------------------------------------------------------|-------------------------------------------------------------------|------------------------------------|--------|--|
| 1               | 3                   |         |                                                                   |                                                                   |                                    |        |  |
| AM1<br>950<br>1 | ss161<br>14349<br>3 | A/<br>G | <b>GAAGGTGACCAAGTTCATG</b> CTAGATTC<br>CAGACACATATCATAACTTCTTT    | <b>GAAGGTCGGAGTCAACGGATT</b> CCAGA<br>CACATATCATAACTTCTTC         | GTAAATCAACAAGTG<br>AATGCTCTTCCTCAT | 1<br>5 |  |
| AM1<br>950<br>2 | ss161<br>14349<br>4 | C/<br>T | <b>GAAGGTGACCAAGTTCATG</b> CTGCAAG<br>CAGATTCCAGACACG             | <b>GAAGGTCGGAGTCAACGGATT</b> ACTGC<br>AAGCAGATTCCAGACACA          | CTCATAGGACGAATC<br>GTTTTGCCGAA     | 1<br>5 |  |
| AM1<br>950<br>3 | ss161<br>14349<br>5 | C/<br>T | <b>GAAGGTGACCAAGTTCATG</b> CTCATCAT<br>GCAACATACGCACCTAC          | <b>GAAGGTCGGAGTCAACGGATT</b> AGCAT<br>CATGCAACATACGCACCTAT        | GAAGAAGTGCATATG<br>CTCTCCCAT       | 1<br>5 |  |
| AM2<br>033<br>3 | ss161<br>14432<br>5 | A/<br>C | <b>GAAGGTGACCAAGTTCATG</b> CTGGGTA<br>ATATCATTATTCTTCAATTTTCAGTT  | <b>GAAGGTCGGAGTCAACGGATT</b> GGGTA<br>ATATCATTATTCTTCAATTTTCAGTG  | CACGTACATCAGTAC<br>AGTACACCTA      | 1<br>5 |  |
| AM2<br>053<br>3 | ss161<br>14452<br>5 | C/<br>T | <b>GAAGGTGACCAAGTTCATG</b> CTCGATA<br>AAAGAAAAATATTCTCCGCCTTC     | <b>GAAGGTCGGAGTCAACGGATT</b> CGATA<br>AAAGAAAAATATTCTCCGCCTTT     | CCAATCTTTAATGGG<br>ACTGACCCAGAT    | 1<br>5 |  |
| AM2<br>156<br>8 | ss161<br>14556<br>0 | C/<br>T | <b>GAAGGTGACCAAGTTCATG</b> CTAAATG<br>TTGTGACTTACGTTGTGTCG        | <b>GAAGGTCGGAGTCAACGGATT</b> CAAAT<br>GTTGTGACTTACGTTGTGTC        | TACCTTCTCCATACTC<br>CTCGGTCAT      | 1<br>5 |  |
| AM2<br>213<br>7 | ss161<br>14612<br>9 | A/<br>C | <b>GAAGGTGACCAAGTTCATG</b> CTGCATG<br>CATACAAGCTTTAATTTGTCGAT     | <b>GAAGGTCGGAGTCAACGGATT</b> CATGC<br>ATACAAGCTTTAATTTGTCGAG      | CATTGCCCCACCAAT<br>TGTTCTTT        | 1<br>5 |  |
| AM2<br>422<br>4 | ss161<br>14821<br>6 | A/<br>G | <b>GAAGGTGACCAAGTTCATG</b> CTGGATG<br>GGAACAAAGAAATGATGGCA        | <b>GAAGGTCGGAGTCAACGGATT</b> GATGG<br>GAACAAAGAAATGATGGCG         | GGTTACATAACATGA<br>TGAGCATGAACCAA  | 1<br>5 |  |
| AM2<br>446<br>0 | ss161<br>14845<br>2 | A/<br>G | <b>GAAGGTGACCAAGTTCATG</b> CTTAGATC<br>AAGTCAGACACTGATTAACA       | <b>GAAGGTCGGAGTCAACGGATT</b> AGATC<br>AAGTCAGACACTGATTAACG        | GATCTTGTCTTTTTT<br>CCTACCATAGTTAT  | 1<br>5 |  |
| AM2<br>465<br>5 | ss161<br>14864<br>7 | A/<br>T | <b>GAAGGTGACCAAGTTCATG</b> CTGAATCT<br>TCTCCAAATGAAAAGTTACTTCAAT  | <b>GAAGGTCGGAGTCAACGGATT</b> GAATC<br>TTCTCCAAATGAAAAGTTACTTCAA   | CAATTGTTAGGAACC<br>CTTCAGGGGAT     | 1<br>5 |  |
| AM2<br>500<br>2 | ss161<br>14899<br>4 | A/<br>T | <b>GAAGGTGACCAAGTTCATG</b> CTACTCAA<br>TTTTGAACTTATAATCTTAATCAATA | <b>GAAGGTCGGAGTCAACGGATT</b> ACTCA<br>ATTTTGAACTTATAATCTTAATCAATT | CAATTAACCTAATGC<br>GTTGCAGTAACTCAA | 1<br>5 |  |
| AM2<br>649<br>8 | ss161<br>15049<br>0 | A/<br>T | <b>GAAGGTGACCAAGTTCATG</b> CTGATTTG<br>TTGCTGCTGGTTTGAGA          | <b>GAAGGTCGGAGTCAACGGATT</b> CTGAT<br>TTGTTGCTGCTGGTTTGAGT        | CAAACAACCTCAGCAG<br>AACCAGCACAA    | 1<br>5 |  |

<sup>1</sup>dbSNP in GenBank under the handle MAUGHAN in batch number 2009A, build B131.

<sup>2</sup>KASPar™ primers: A1 are A2 primers are SNP allele specific. Bolded portions of the primers identify the sequence tags used in the KASPar™ secondary PCR reaction.

<sup>3</sup>Linkage Groups are numbers as described by Maughan et al. [22].
